# Supplementary material for: An asymmetrically tipped MoS2/CdS heterostructure for high-performance photocatalytic plastic reforming
Source: Royal Society of Chemistry journal article supplement (doi:10.1039/d5mh00658a), 2025-01-01
Supplement: d5mh00658a1.pdf [file d5mh00658a1.pdf]

## Supplementary Information

### Asymmetrically Tipped MoS<sub>2</sub>/CdS Heterostructure for High-Performance Photocatalytic Plastic Reforming

Yu Yao<sup>a</sup>, Jinqiang Zhang<sup>a,\*</sup>, Panpan Zhang<sup>b</sup>, Lei Shi<sup>c</sup>, Kunsheng Hu<sup>a</sup>, Tara Pukala<sup>d</sup>, Yanlin Shi<sup>e</sup>, Zhongfan Jia<sup>e</sup>, Shaobin Wang<sup>a</sup>, and Xiaoguang Duan<sup>a,\*</sup>

<sup>a</sup> *School of Chemical Engineering, The University of Adelaide, Adelaide, SA 5005, Australia*

<sup>b</sup> *School of Chemistry and Chemical Engineering, Jiangsu University, Zhenjiang 212013, China*

<sup>c</sup> *College of Materials Science and Engineering, Nanjing Forestry University, Nanjing, Jiangsu, 210037 China*

<sup>d</sup> *School of Physics, Chemistry and Earth Sciences, The University of Adelaide, SA 5005, Australia*

<sup>e</sup> *Institute for Nanoscale Science and Technology, College of Science and Engineering, Flinders University, Bedford Park, South Australia 5042, Australia*

\*Corresponding author: Jinqiang Zhang; Xiaoguang Duan

E-mail address: jinqiang.zhang@adelaide.edu.au (J. Zhang)

E-mail address: xiaoguang.duan@adelaide.edu.au (X. Duan)

This **Supplementary Information** include: **13** Pages, **11** Figures, and **6** References

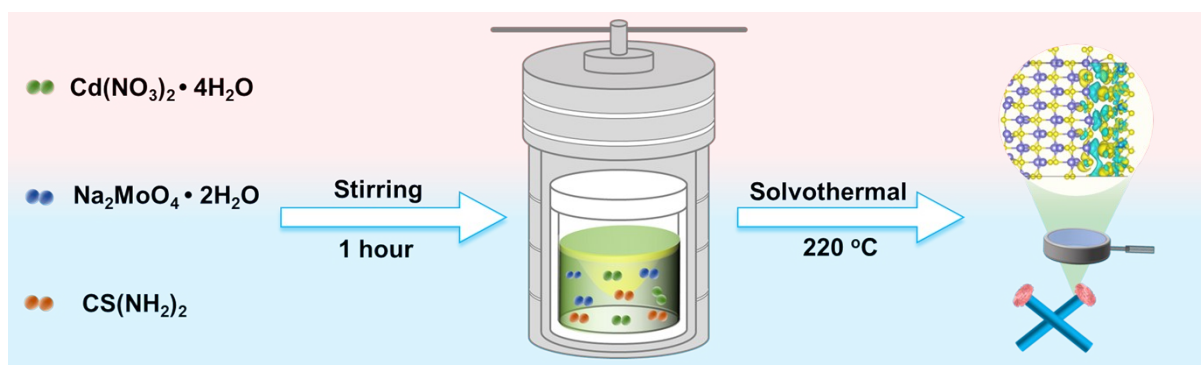

**Fig. S1.** Schematic diagram of the preparation of CdS and various x-MoS<sub>2</sub>/CdS.

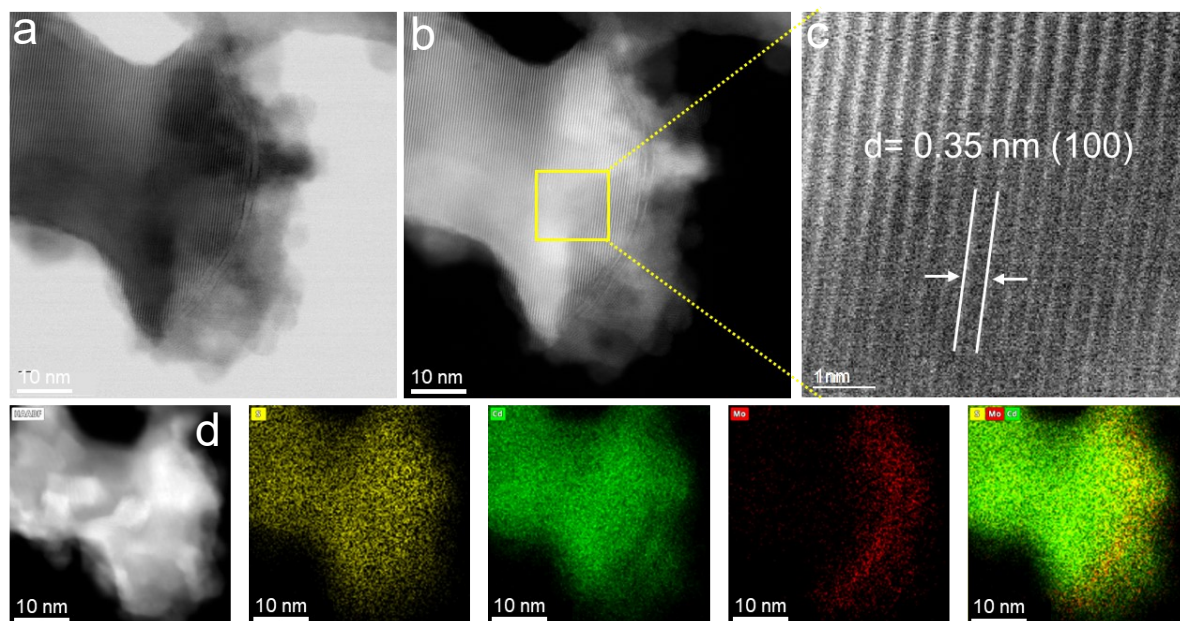

**Fig. S2.** Morphology of 3-MoS<sub>2</sub>/CdS. (a) HRTEM and (b, c) HAADF-STEM images for 3-MoS<sub>2</sub>/CdS. (d) HAADF-STEM and EDS mapping images of 3-MoS<sub>2</sub>/CdS.

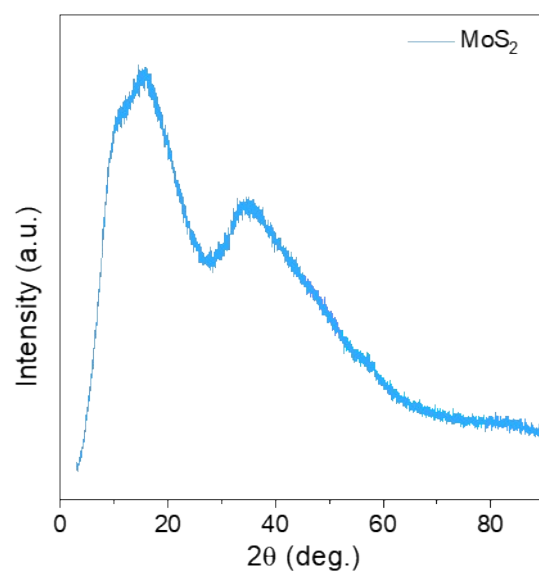

**Fig. S3.** XRD pattern of MoS<sub>2</sub>.

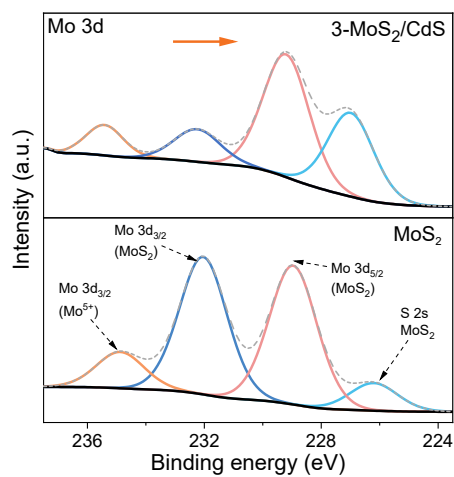

**Fig. S4.** Mo 3d XPS spectrum for CdS and 3-MoS<sub>2</sub>/CdS.

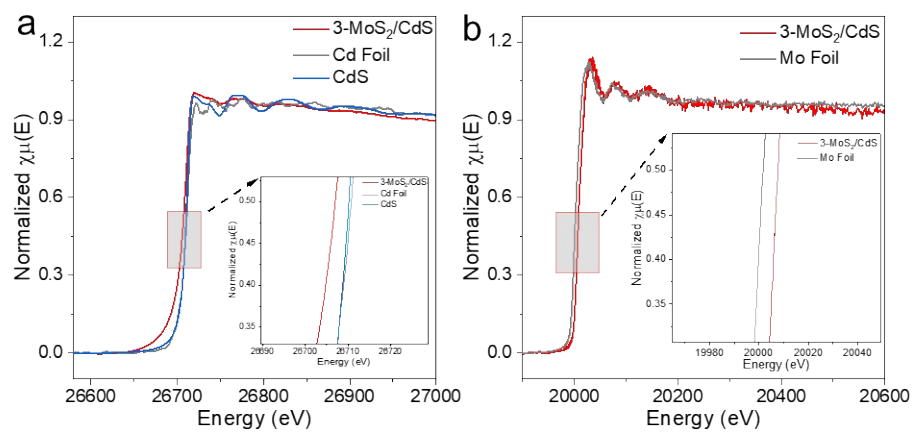

**Fig. S5.** XANES results. (a) Cd K-edge spectra of CdS, 3-MoS<sub>2</sub>/CdS and reference samples. (b) Mo K-edge spectra of 3-MoS<sub>2</sub>/CdS and reference samples.

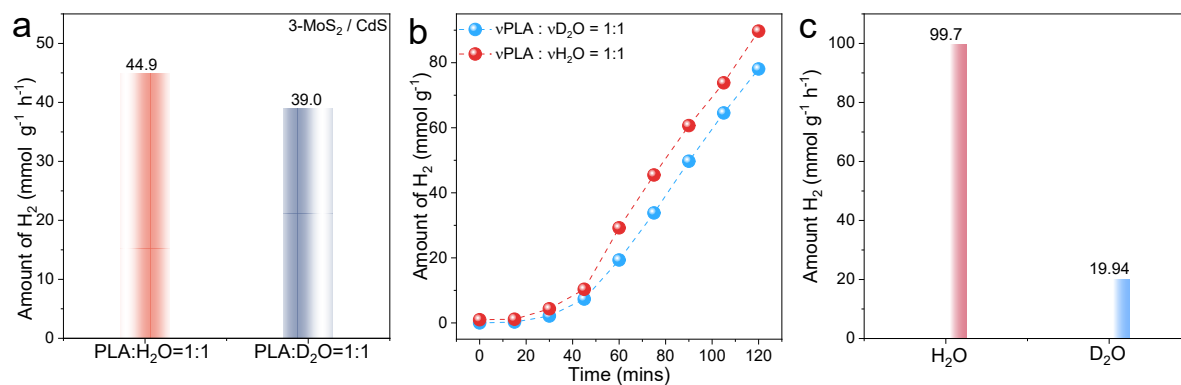

**Fig. S6.** (a-b) Time-dependent HER of 3-MoS<sub>2</sub>/CdS in H<sub>2</sub>O and D<sub>2</sub>O under visible light irradiation, respectively. (c) Comparison of HER rates of 3-MoS<sub>2</sub>/CdS catalyst between using H<sub>2</sub>O and D<sub>2</sub>O as media.

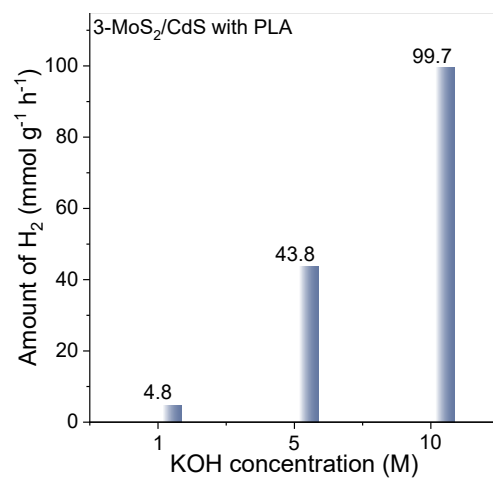

**Fig. S7.** H<sub>2</sub> generate rate for 3-MoS<sub>2</sub>/CdS under the different KOH concentration pretreat PLA.



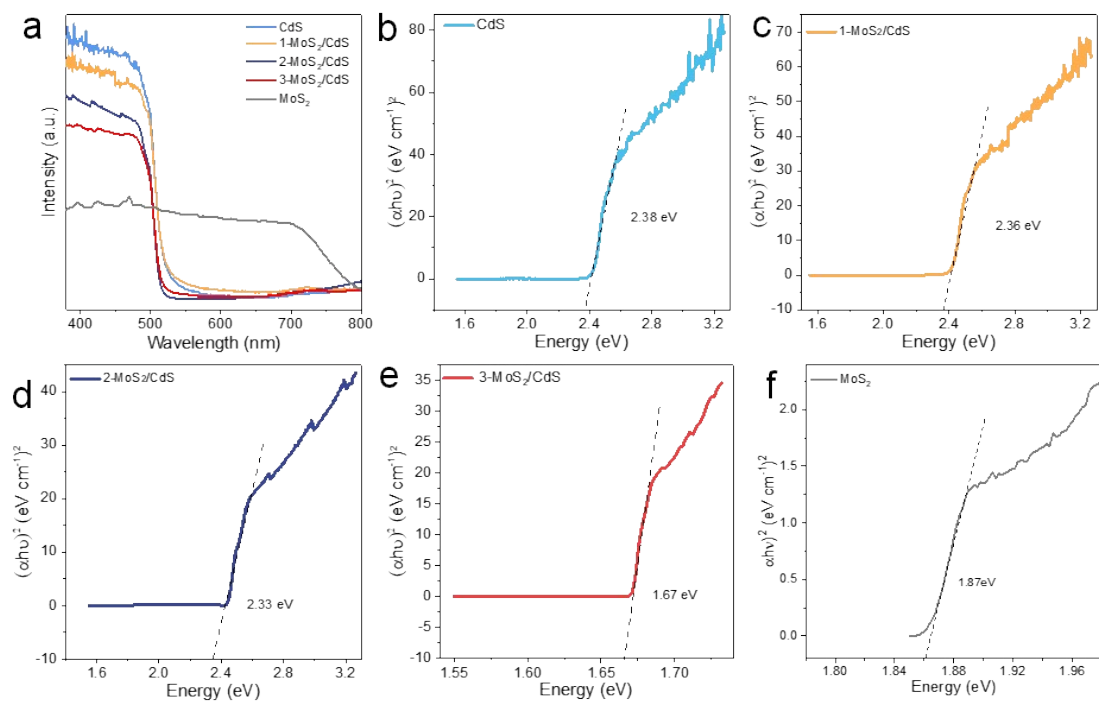

**Fig. S8.** (a) UV-Vis spectra and (b-f) estimation of bandgap for CdS, 1-MoS<sub>2</sub>/CdS, 2-MoS<sub>2</sub>/CdS, 3-MoS<sub>2</sub>/CdS and MoS<sub>2</sub>.

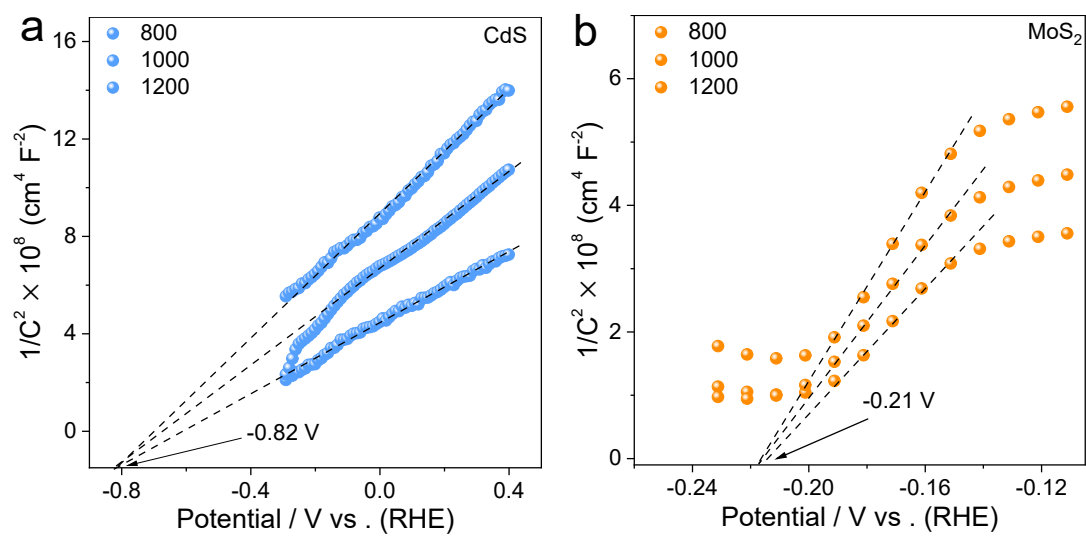

**Fig. S9.** Mott-Schottky curves of CdS and MoS<sub>2</sub>.

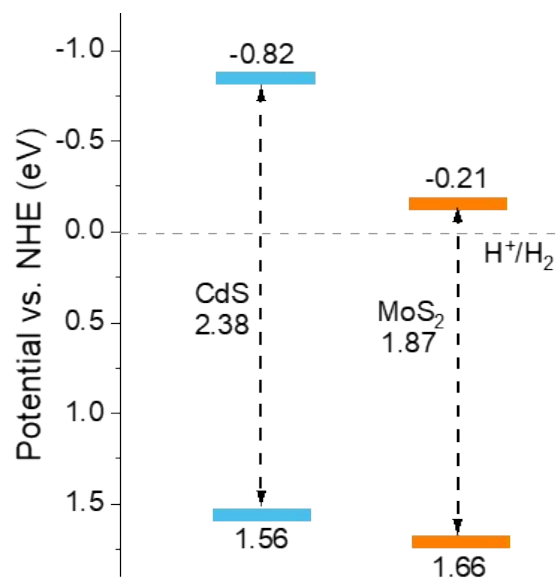

**Fig. S10.** Schematic for electronic band structure for CdS and MoS<sub>2</sub>.

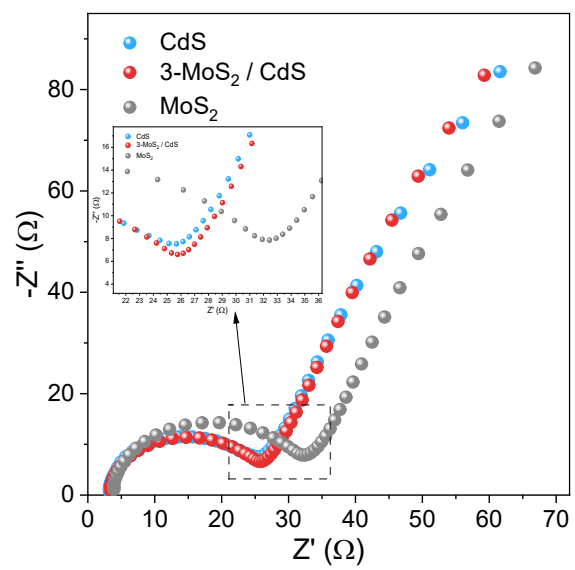

**Fig. S11.** EIS Nyquist plots of CdS, MoS<sub>2</sub> and 3-MoS<sub>2</sub>/CdS.

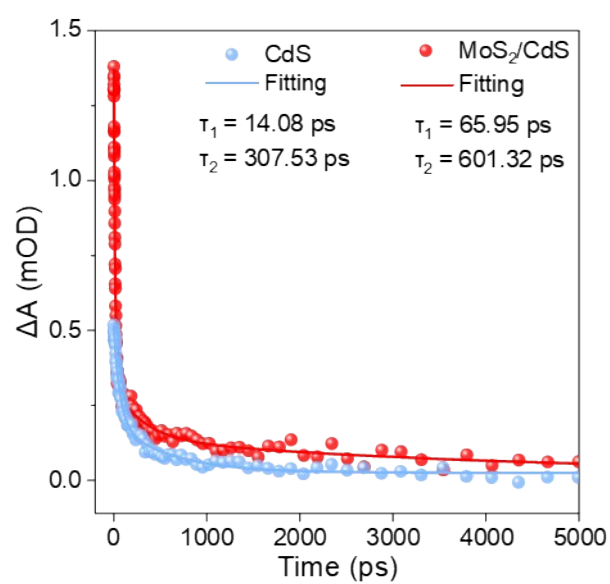

**Fig. S12.** Normalized decay kinetics and fitted curves of CdS and 3-MoS<sub>2</sub>/CdS at 400 nm.

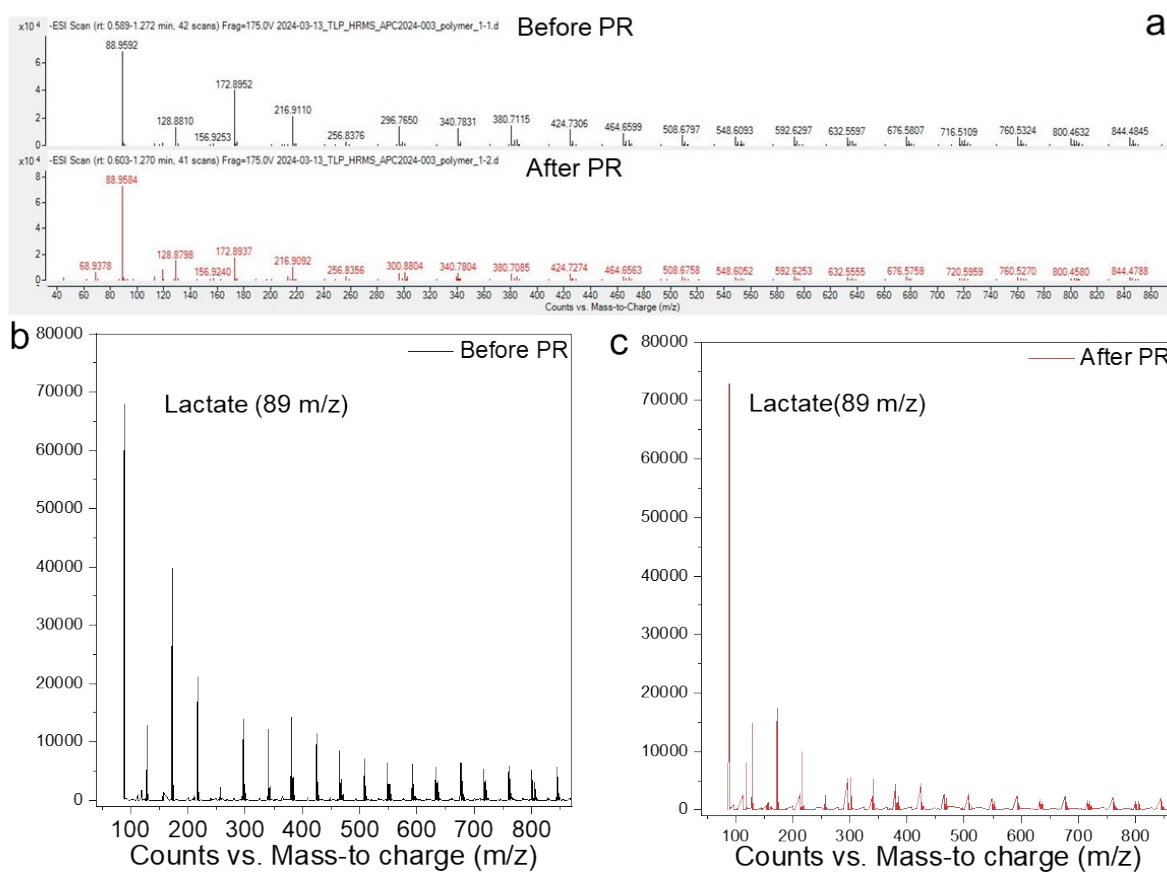

**Fig. S13.** (a) LC-MS spectrum of solubilized PLA components in 10 M KOH after pretreatment, corresponding to samples shown in (b) and (c). (b) Before PR; (c) After PR. The intensity at 89 m/z, attributed to lactate, increases after light irradiation, indicating the accumulation of lactate as a degradation product.

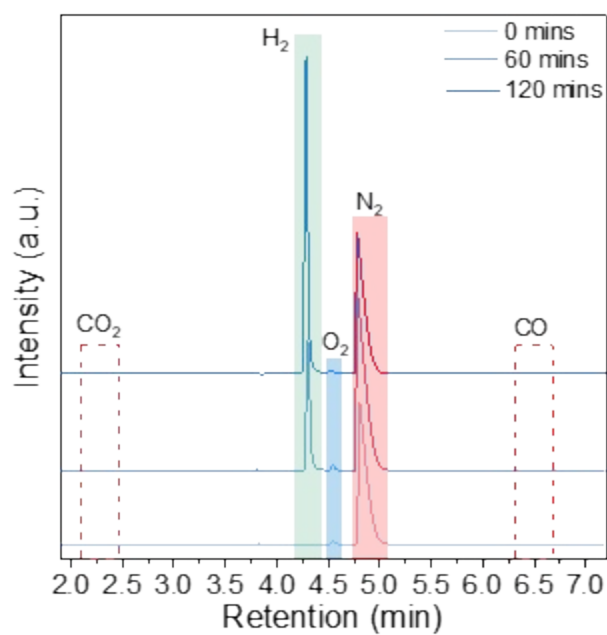

**Fig. S14.** Gas chromatography spectrum of the gaseous products generated from the photocatalytic depolymerization of PLA solution using the 3-MoS<sub>2</sub>/Cd catalyst under light irradiation. The characteristic peaks corresponding to H<sub>2</sub>, O<sub>2</sub>, N<sub>2</sub>, and CO<sub>2</sub> are indicated at 2 hours.

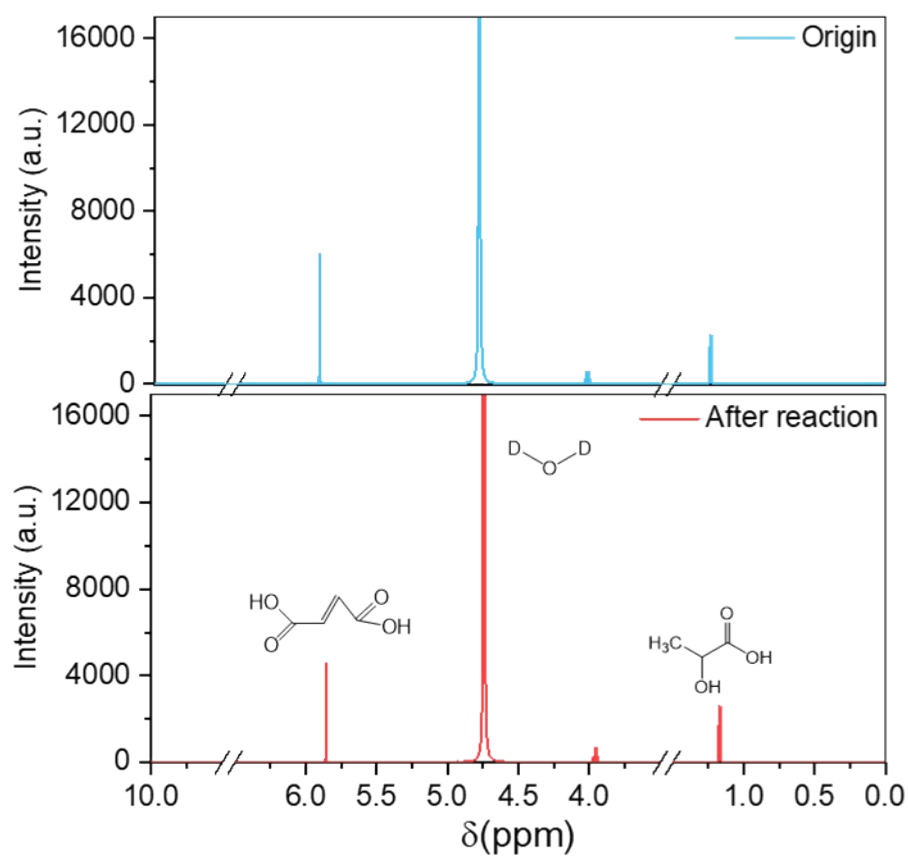

**Fig. S15.**  $^1\text{H}$  NMR spectra for PLA pre-treated in 10 M KOH (upper) and that after 2 hours PR (lower).
